1 **Comparative transcriptomics reveals domestication-associated features of Atlantic**  
2 **salmon lipid metabolism**

3

4 **Domestication and lipid metabolism in salmon**

5

6 Yang **Jin**<sup>1+</sup>, Rolf Erik **Olsen**<sup>1</sup>, Thomas Nelson **Harvey**<sup>2</sup>, Mari-Ann **Østensen**<sup>1</sup>, Keshuai **Li**<sup>3</sup>, Nina **Santi**<sup>4</sup>, Olav  
7 **Vadstein**<sup>5</sup>, Jon Olav **Vik**<sup>2</sup>, Simen Rød **Sandve**<sup>2\*</sup>, Yngvar **Olsen**<sup>1\*</sup>

8

9 <sup>1</sup> Department of Biology, NTNU Norwegian University of Science and Technology, NO-7491 Trondheim,  
10 Norway.

11 <sup>2</sup>Department of Animal and Aquacultural Sciences, Norwegian University of Life Sciences, NO-1432 Ås, Norway

12 <sup>3</sup>BioMar AS, NO-7010 Trondheim, Norway

13 <sup>4</sup>AquaGen AS, NO-7010 Trondheim, Norway

14 <sup>5</sup> Department of Biotechnology and Food Science, NTNU Norwegian University of Science and Technology,  
15 NO-7491 Trondheim, Norway.

16 <sup>+</sup> Present address: Department of Animal and Aquacultural Sciences, Norwegian University of Life Sciences,  
17 NO-1432 Ås, Norway

18 \* shared corresponding author

19

20

21 **Abstract**

22

23 Domestication of *Salmo salar* has imposed strong selection for production traits since the  
24 1970s. The domestication has also imposed a radical shift in diet. Whereas wild salmon eats  
25 invertebrates, crustaceans and fish, the dietary lipids in domestic feed has since 1990 gradually  
26 shifted from fish oil (FO) to vegetable oil (VO), causing a decrease intake of long-chain  
27 polyunsaturated fatty acids (LC-PUFA). We tested the hypothesis that this shift has induced  
28 domestication-specific features of lipid metabolism in a 96-day feeding trial of domesticated  
29 and wild salmon fed diets based on FO, VO or phospholipids (PL). We addressed this by  
30 sampling tissues central in fat uptake (pyloric caeca) and processing (liver) and quantifying  
31 RNA expression and fatty acid composition. Domesticated salmon grew faster than wild  
32 salmon, with higher gene expression in glucose and lipid metabolism pathways. The promoters  
33 of differentially expressed genes were enriched for transcription factors involved in circadian  
34 clock regulation. Domesticated salmon had lower expression of *cry2* and *nr1dl*, genes involved  
35 in negative regulation of circadian rhythm, with possible implications for the diurnal cycle of  
36 feed ingestion and basal metabolic rate. Only wild salmon showed a significant impact on  
37 growth of VO *versus* PL or FO feed, whereas domesticated but not wild salmon upregulated  
38 key LC-PUFA synthesis genes *fads2d5* and *fads2d6a* in response to VO diet. Domesticated  
39 salmon had higher LC-PUFA but lower 18:3n-3 and 18:2n-6 in liver when fed VO, suggesting

40 that domesticated salmon can better compensate for dietary shortage of LC-PUFA compared to  
41 wild salmon.

42

43 **Keywords** Wild salmon; Domestication; Vegetable oil; Circadian regulation; Long-chain  
44 polyunsaturated fatty acids; Transcriptomics

45

## 46 **1. Introduction**

47

48 Domestication of Atlantic salmon started in 1971 and since then they have undergone selection  
49 in breeding programs for better growth and performance, later sex maturation, higher feed  
50 conversion rate and many other measured traits (Gjedrem, Gjøen, & Gjerde, 1991). This has led  
51 to genetic divergence, allowing domesticated salmon to grow twice as fast as wild salmon  
52 (Fleming & Einum, 1997; C. Roberge, Normandeau, Einum, Guderley, & Bernatchez, 2008).

53 Compared to wild salmon, domesticated salmon are more aggressive during feeding in the tank  
54 environment, and have higher feed intake, feed utilization, and increased metabolic efficiency  
55 (Fleming & Einum, 1997; Christian Roberge, Einum, Guderley, & Bernatchez, 2006;  
56 Thodesen, Grisdale-Helland, Helland, & Gjerde, 1999). In addition to the targeted selection on  
57 production traits, domestication is also associated with unintentional selection on traits that are  
58 linked to the new domestic environments (Fleming & Einum, 1997; Heath, Heath, Bryden,  
59 Johnson, & Fox, 2003).

60

61 One environmental variable that changes dramatically with domestication is the feed  
62 composition and feeding regimes (Ytrestøyl, Aas, & Åsgård, 2015). In the wild, salmon is an  
63 opportunistic predator and its diet consists mostly of invertebrates in rivers, and crustaceans and  
64 small fish after they migrate to the sea. Domestic salmon on the other hand have ‘unlimited’  
65 access to food and their diet is composed of proteins from fish and plant meal, as well as a lipid  
66 source. Up until the late 1990s this lipid source was mainly fish oil (FO) from wild fisheries.  
67 During the last two decades the FO have gradually been substituted with vegetable oils (VO)  
68 with a very different profile of long-chain polyunsaturated fatty acids (LC-PUFAs) compared to  
69 what salmon is exposed to in the wild. Lipids are not only major energy source for Atlantic  
70 salmon, but also play important roles in metabolic regulation and cell membrane function  
71 (Sargent, Tocher, & Bell, 2002). The LC-PUFAs docosahexaenoic acid (DHA, 22:6n-3),  
72 eicosapentaenoic acid (EPA, 20:5n-3) and arachidonic acid (ARA, 20:4n-6) are particularly  
73 important. They are key components of cell membranes, they regulate cell membrane fluidity,  
74 function as precursors for eicosanoid production, and are important components of neural  
75 tissues (Izquierdo, 1996; Sargent et al., 2002). It is therefore likely that modern VO based diets,  
76 with significantly reduced levels of DHA and EPA, have selected for a domestic features of  
77 lipid metabolism.

78

79 Feeding of VO-based diets naturally devoid of LC-PUFA is known to induce a compensatory  
80 response of endogenous synthesis of LC-PUFA in salmon (Datsomor et al., 2019; Stubhaug et  
81 al., 2005; Zheng, Tocher, Dickson, Bell, & Teale, 2004). Due to the past 20 years of including  
82 VO as lipid sources in salmon feed, current generations of domesticated salmon are possibly  
83 better adapted to dietary VO compared to earlier generations, but whether this involves higher  
84 LC-PUFA synthesis abilities is unclear. Another major difference between wild and  
85 domesticated diets is the levels of dietary phospholipids (PLs). PLs are important for growth  
86 and development of salmon especially for early developmental stages (Poston, 1990; Taylor et  
87 al., 2015), and dietary PL are more efficient at delivering LC-PUFA into the circulatory system  
88 and ultimately the cells compared to neutral lipids such as triacylglycerols (Cahu et al., 2009; Y.  
89 Olsen et al., 2014a). The efficiency of utilizing dietary PL could therefore also be shaped during  
90 domestication in domesticated fish, however this has never been investigated.

91

92 In the present study, we aim to explore the idea that the diet of domesticated salmon has shaped  
93 and selected for ‘domestic features’ of salmon lipid metabolism. We approach this question by  
94 running a feeding trial with both domesticated and wild salmon that are fed contrasting diets  
95 rich in either FO, VO or PL and then perform comparative transcriptomic and fatty acid  
96 analyses of two tissues involved in lipid uptake (pyloric caeca) and endogenous synthesis of  
97 LC-PUFAs (liver). Our study shows clear differences between metabolism in the wild and  
98 domestic salmon genetic backgrounds and suggests that the regulation of genes involved in

99 circadian rhythm and lipid metabolism have been key targets during domestication related  
100 selection.

101

## 102 **2. Material and methods**

103

### 104 2.1 Fish, diets and experimental plan

105

106 This experiment was approved by Norwegian Food Safety Authority (Case No. 16/10070). A  
107 fast-growing strain of Atlantic salmon was kindly provided by the breeding company AquaGen  
108 AS (Trondheim, Norway). The domesticated fish have been selected for good growth and  
109 performance for 11 generations since 1971. The previous generations of domesticated salmon  
110 were always fed standard commercial diets available at the time. This means that the fish were  
111 given a freshwater diet with only marine ingredients at early developmental stages but have  
112 experienced a gradual switch in seawater diet from FO to VO since the 1990s. A group of wild  
113 salmon eggs was purchased from Haukvik Smolt AS, which is a live wild salmon gene bank  
114 situated in Trøndelag, Norway. This gene bank is operating on behalf of the Norwegian  
115 Environmental Agency to preserve genetic diversity of Norway's wild Atlantic salmon. The  
116 parents of the wild salmon used in the present study was from the first generation of salmon  
117 originally caught in 2008 in Vosso river of Norway. Wild salmon were kept in outdoor tanks  
118 with a transparent roof, with waters that has same temperature as river. The wild fish was fed

119 “Vitalis Røye” diet from Skretting AS  
120 (<https://www.skretting.com/nb-NO/produkter/vitalis-r-ye/476027>), which has an EPA + DHA  
121 content of 19-20 % of the fat, and 70 % of the ingredients are of marine origin. Approximately  
122 1300 newly fertilized eggs of both domesticated and wild salmon were transported to hatching  
123 tanks in Ervik hatchery (Frøya, Norway). The water temperature of hatching tanks for  
124 domesticated and wild eggs were slightly different to ensure that both strains hatched and  
125 start-feed at the same time.  
126  
127 When the yolk sac was depleted, the wild and domestic salmon strains were separated into 12  
128 tanks (2 fish strains x 3 diet treatments x 2 replicate tanks) with 100L water and 200 fish per  
129 tank. Feeding was initiated from the next day. The experimental tanks were randomly  
130 distributed in the hatchery and the fish of each tank were reared under same temperature,  
131 continuous light and fed 24h continuously feed every day. The fish was given three contrasting  
132 diets, either a fish oil (FO) diet high in LC-PUFA, or a plant and vegetable oil (VO) enriched  
133 diet low in LC-PUFA, or a marine phospholipid (PL) enriched diet with medium level of  
134 LC-PUFA but rich in PL (Table 1). All three diets were given to the fish from start feeding up to  
135 94 days. To ensure sufficient DHA and EPA levels the PL used to prepare PL diet was a 50/50  
136 mixture of krill oil (Aker BioMarine AS, Lysaker, Norway) and herring roe oil (kindly provided  
137 by Erik Løvaas from Marine BioExploitation AS, Tromsø, Norway). The feeds were produced  
138 by Sparos AS (Olhão, Portugal). The composition of the diets is shown in Supplementary Table

139 1. FO diets have higher DHA and ARA than PL diet, while the EPA composition was similar  
140 between the two diets (Table 1). VO diet contains higher 18:3n-3 and 18:2n-6 but lower DHA,  
141 EPA and ARA compared to the other two diets.

142

143 Fish was sampled after 94 days of feeding. The fish were sacrificed by exposure to 200 mg/ml  
144 Benzoak vet. (ACD Pharmaceuticals AS, Oslo, Norway), then immediately put in sterile petri  
145 dishes and dissected under a dissecting microscope. The pyloric caeca and liver tissues were  
146 immediately transferred into 2mL Eppendorf tubes, and either filled with RNAlater and put on  
147 ice for RNA isolation, or frozen in dry ice for lipid extraction. Tissues for RNA isolation were  
148 kept at 4°C for 24h to allow sufficient penetration of the solution into the tissues, and then kept  
149 at -80 °C until RNA extraction. Tissues for lipid extraction were directly transferred to -80 °C  
150 after sampling.

151

152 2.2 RNA isolation and transcriptomic sequencing

153

154 Four individual fish from each tank were used for RNA isolation. The RNA extraction was  
155 performed with the RNeasy Plus Universal Kit (Qiagen, Hilden, Germany), according to the  
156 manufacturer's instructions. The concentration and integrity of RNA were determined by a  
157 Nanodrop 8000 (Thermo Fisher Scientific, Waltham, USA) and a 2100 Bioanalyzer (Agilent  
158 Technologies, Santa Clara, USA), respectively. All RNA samples had RNA integrity (RIN)



159 values higher than 8, which is sufficient for RNA sequencing. Sequencing libraries were  
160 prepared with a TruSeq Stranded mRNA Library Prep Kit (Illumina, San Diego, USA)  
161 according to the manufacturer's protocol. Libraries were sequenced using 100bp single-end  
162 mRNA sequencing (RNA-seq) on Illumina Hiseq 2500 (Illumina, San Diego, CA, USA) at the  
163 Norwegian Sequencing Centre (Oslo, Norway).

164

165 The method for handling RNA-sequencing (RNA-seq) data has been described in detail in  
166 previous studies (Gillard et al., 2018; Jin et al., 2018). In brief, read sequences were quality  
167 trimmed using Cutadapt (v1.8.1) before being aligned to the salmon genome (ICSASG\_v2).  
168 Raw genes counts were generated using HTSeq-counts (v0.6.1pl) and the NCBI salmon  
169 genome annotation (available for download at  
170 [http://salmobase.org/Downloads/Salmo\\_salar-annotation.gff3](http://salmobase.org/Downloads/Salmo_salar-annotation.gff3)).

171

172 2.3 Lipid class separation and fatty acid analysis

173

174 Total lipid was extracted from two individual fish from each tank by using the method of  
175 Folch, Lees, and Stanley (1957). Extracted total lipid was then applied onto 10 x 10 cm silica  
176 plates (Merck, Darmstadt, Germany) and separated by using methyl  
177 acetate/isopropanol/chloroform/methanol/0.25% KCl (25:25:25:10:9, by vol) for polar lipids  
178 and hexane/diethyl ether/glacial acetic acid (80:20:2, by vol) for neutral lipids (R. E. Olsen &

179 Henderson, 1989). To avoid the oxidation of fatty acids, the plates were exposed to iodine  
180 vapor to visualize the lipid class for fatty acids analysis (Li & Olsen, 2017). Lipid bands of  
181 phosphatidylcholine (PtdCho), phosphatidylethanolamine (PtdEtn) and triacylglycerol (TAG)  
182 were separately scrapped out into 10mL glass tubes. Fatty acid methyl esters (FAME) of each  
183 lipid class were prepared by acid-catalyzed transesterification at 50°C for 16 hours (Christie,  
184 1973) before quantified by a Agilent 7890B gas chromatograph with flame ionization detector  
185 (Agilent Technologies, Santa Clara, CA).

186

#### 187 2.4 Data analysis

188

189 The analysis of RNA-seq data was performed in R (v3.4.1) (Team, 2013). Only genes with a  
190 minimum counts level of at least 1 count per million (CPM) in more than 25% of samples from  
191 each tissue were kept for differential expressional analysis. Differential expression was tested  
192 separately on pyloric caeca and liver using R package edgeR (Robinson, McCarthy, & Smyth,  
193 2010). A full interaction model (Diet + Strain + Diet x Strain) was used in each tissue  
194 separately to find differential expressed genes (DEGs) between wild and domesticated salmon  
195 under any dietary treatments. Genes with a false discovery rate (FDR), an adjusted  $p$  value ( $q$ )  
196  $< 0.05$  and absolute  $\log_2$  fold change ( $|\text{Log}_2\text{FC}|$ )  $> 1$  were considered to be differentially  
197 expressed genes (DEGs) between any test conditions. KEGG ontology enrichment analysis  
198 (KOEA) was conducted using edgeR. Significant values ( $p < 0.05$ ) were generated based on

199 hypergeometric test where the number of DEGs was compared to total genes annotated to each  
200 KO term. A test for enrichments of transcription factor binding sites (TFBS) motifs in the  
201 promoter regions (between -1000bp and 100bp from transcription starting sites) of salmon  
202 genes was done by using a hypergeometric test in the R package SalMotifDB, which is  
203 interacting with a database of transcription factor binding sites for salmonids  
204 (<https://salmobase.org/apps/SalMotifDB>) (Mulugeta et al., 2019).

205

206 To further investigate diet specific effect on gene expression between wild and domesticated  
207 salmon, samples of different diet were separated to be used for testing differential expression of  
208 genes between wild and domesticated salmon under each diet. Same cut-off was used ( $q < 0.05$   
209 &  $|\text{Log}_2\text{FC}| > 1$ ) to identify DEGs. For visualize expression levels between different genes and  
210 tissues, normalized counts in the form of transcripts per million (TPM) values were generated.  
211 Raw gene counts were first divided by their mRNA length in kilobases to normalize for  
212 transcript length, and then divided by the total number of counts from each library to  
213 normalize for sequencing depth (Jin et al., 2018).

214

215 Statistical analysis of fish weight and fatty acids composition was also performed in R.  
216 Two-way ANOVA with Tukey HSD post hoc test was used to test the effect of strain and diet  
217 on fish weight and fatty acids composition of each lipid class, tissue and sampling day.  
218 Differences were considered significant when  $p < 0.05$ .

219

## 220 **3. Results**

221

### 222 **3.1 Growth and development**

223

224 The domesticated salmon was significantly larger than wild salmon at all sampling times  
225 (Figure 1 and Supplementary Table 2). At the end of the trial (94 days), domesticated salmon  
226 reached an average 4.5g, while wild salmon had a mean size of 2.6g. There were no significant  
227 differences in weight between domesticated salmon fed FO, VO and PL enriched diets. The  
228 growth of wild fish appeared more sensitive to different diets, with VO-fed fish being smaller  
229 than PL-fed fish at day 65 ( $p = 0.03$ ) and day 94 ( $p = 0.02$ ). FO-fed wild salmon showed  
230 intermediate weights, but their weights were not significantly different from either FO or PL  
231 diets. A complete table of fish weight and statistics from all time points is found in  
232 Supplementary Table 2.

233

### 234 **3.2 Transcriptomic differences between domesticated and wild salmon**

235

236 On average 20 million reads were generated from each sample (min: 12M reads, max:32M  
237 reads), with ~85% of the reads mapping to the salmon genome. Out of 81597 annotated loci,  
238 28980 and 24119 genes passed this filtering criteria in pyloric caeca and liver, respectively.

239 Principle component analysis (PCA) on Log<sub>2</sub> CPM of the top 1000 most variable genes,  
240 identified a clear separation of domesticated and wild salmon in both pyloric caeca and liver  
241 (Figure 2).

242

243 A full interaction model design in edgeR (Chen, McCarthy, Robinson, & Smyth, 2014) was  
244 applied to test differences in gene expression between domesticated and wild salmon across  
245 all dietary treatments on day 94. This resulted in identification of 187 differential expressed  
246 genes (DEGs) in pyloric caeca and 379 DEGs in liver between wild and domesticated salmon.

247 The complete list of DEGs in pyloric caeca and liver is shown in Supplementary Table 3. By  
248 mapping DEGs to the KEGG database of metabolic pathways, we have identified 17  
249 pathways that were significantly enriched ( $p < 0.05$ ) in pyloric caeca, while 11 pathways were  
250 enriched in liver (Figure 3 A and Supplementary Table 4). The DEGs in pyloric caeca were  
251 enriched in pathways for glycerophospholipid, glycosphingolipid and glycosaminoglycan  
252 metabolism, which are known to be major component of cell membrane (Figure 3 A). A  
253 number of cell-signalling pathways were also enriched, including phosphatidylinositol  
254 signalling, calcium signalling, apelin signalling, C-type lectin receptor signalling and GnRH  
255 signalling pathways. In liver, the DEGs were enriched in metabolic pathways including  
256 linoleic acid, glycolysis and gluconeogenesis, fructose and mannose, cysteine and methionine,  
257 retinol metabolism pathways (Figure 3 A). Enrich genes involved in intercellular interactions

258 included cytokine-cytokine receptor interaction, neuroactive ligand-receptor interaction and  
259 gap junction pathways.

260

261 Transcription factor binding site (TFBS) motif enrichment analysis on promoters (-1000bp to  
262 200bp from TSS) of DEGs for each tissue resulted in 16 significant ( $p < 0.005$ ) enriched motifs  
263 in pyloric caeca and 128 enriched motifs in liver (Supplementary Table 4). The most enriched  
264 motif in pyloric caeca was BHLHB2, which is known to be involved in circadian regulation  
265 (Figure 3 B) (Dunlap, 1999). Several other enriched motifs are associated with intestinal  
266 development and cell differentiation, including ETV2 (Jedlicka & Gutierrez-Hartmann, 2008),  
267 ATOH1 (Shroyer et al., 2007), GR (Lebenthal & Lebenthal, 1999), GATA-1 (Kanki et al.,  
268 2017). The most enriched TFBS motif in liver was a CLOCK motif, which is a predicted  
269 binding motif for the master regulator of the circadian clock (Dunlap, 1999). Similar to pyloric  
270 caeca, BHLHB2 motif was also identified in the top 10 most enriched TFBS motifs in liver. In  
271 addition, three lipid metabolism related motifs (RXRA, PPARG, PLAGL2) populated the  
272 top-10 enriched TFBS list (Tontonoz, Hu, & Spiegelman, 1994; Van Dyck et al., 2007).

273

274 To further investigate differences in expression of genes linked to circadian rhythm between  
275 wild and domesticated salmon, we compared the expression of key genes encoding circadian  
276 clock related transcription factors *clock*, *nr1d1*, *bmal1*, *bhlhb2*, *per*, and *cry* (Figure 3 C and  
277 Supplementary Figure 1). A systematic difference in circadian clock gene expression was

278 observed between livers of wild and domesticated salmon (Figure 3 C and Supplementary  
279 Figure 1), although not all genes were significant regulated at  $q < 0.05$ . Nevertheless, the  
280 regulators (*cry2-c*, *nr1dl-a*, *per1-a*, *bhlhb2-d* and *nr1dl-a* genes) acting as suppressors of the  
281 master regulators of circadian rhythm (CLOCK/BMAL) were consistently lower expressed in  
282 domesticated salmon compare to wild (Figure 3 C). However, similar expression levels of  
283 *clock* (logFC=0.2,  $q=0.7$ ) and *bmal1* (logFC=-0.1,  $q=0.8$ ) genes which encodes master  
284 regulator were found between domesticated and wild salmon (Figure 3 C and Supplementary  
285 Figure 1). No difference in circadian clock gene expression was observed between pyloric  
286 caeca of wild and domesticated salmon.

287

### 288 **3.4 Differential regulation of lipid metabolism genes between domesticated and wild** 289 **salmon**

290

291 To better understand the effect of diets on gene expression differences between domesticated  
292 and wild salmon, we compared gene expression separately between domesticated and wild  
293 under each diet. In pyloric caeca, a total number of 230 DEGs were identified between  
294 domesticated and wild salmon with FO diet, 164 DEGs were found with VO diet and 689  
295 DEGs were found with PL diet (Supplementary Table 5). Out of these DEGs, only 8 genes  
296 were involved in lipid metabolism pathways. This includes *ptdss2* genes of phosphatidylserine  
297 synthesis, which was significantly ( $q < 0.05$  &  $|\text{Log}_2\text{FC}| > 1$ ) higher expressed in domesticated

298 salmon regardless of the dietary treatment (Figure 4). Two phosphatidylethanolamine  
299 synthesis genes, *pcyt2c-a* and *pcyt2c-b* were both higher expressed in domesticated than wild  
300 salmon when fed FO or VO diet, while no difference in gene expression was found when the  
301 fish was given PL diet. On the other hand, *etnk2-a* gene involved in  
302 phosphatidylethanolamine synthesis, was significantly higher expressed in domesticated  
303 compared to wild salmon only when the fish was given PL diet. Feeding with VO induced key  
304 genes in LC-PUFA synthesis pathway (*fads2d5* and *fads2d6a*, see Figure 4) in both  
305 domesticated and wild salmon. However, no expression difference was observed for these two  
306 genes, or any other LC-PUFA synthesis genes between domesticated and wild salmon for any  
307 dietary treatment (Figure 4 and Supplementary Table 5).

308

309 The number of DEGs between liver of domesticated and wild salmon under each diet was 591  
310 (FO), 179 (VO) and 243 (PL) (Supplementary Table 5). Liver had more DEGs involved in  
311 lipid metabolism (28) compared to pyloric caeca (8). Four DEGs in liver had significantly  
312 ( $q < 0.05$  &  $|\text{Log}_2\text{FC}| > 1$ ) higher expression in domesticated compared to wild salmon under  
313 VO diet, but not under FO or PL diet (Figure 5 B). This includes genes with key functions in  
314 LC-PUFA synthesis (*fads2d5*,  $\text{Log}_2\text{FC} = 1$  &  $q = 0.02$ ), gene involved in acyl-CoA synthesis  
315 (*acsbg2b-b*,  $\text{Log}_2\text{FC} = 1.4$  &  $q = 0.03$ ), and fatty acid transport (*fabp7b*,  $\text{Log}_2\text{FC} = 3.6$  &  $q =$   
316  $0.02$ ). Although not significant, domesticated salmon fed VO diet also had higher expression  
317 of *fads2d6a* ( $\text{Log}_2\text{FC} = 0.7$  &  $q = 0.2$ ) and *srebpld* ( $\text{Log}_2\text{FC} = 0.8$  &  $q = 0.2$ ) compared to



318 wild salmon fed same diet, while the expression difference of the two genes was negligible  
319 when the fish was under FO or PL diet (Figure 5 A & B). A key gene involved in conversion  
320 of lipids to energy, *cpt1aa* was lower expressed (Log2FC = -1.2 &  $q = 0.01$ ) in domesticated  
321 salmon when fed VO diet. The regulator of fatty acid metabolism *pparg-b* was consistently  
322 higher expressed in domesticated compared to wild salmon under all diets, but only  
323 significantly different for salmon fed FO diet (Figure 5 A).

324

325 In addition to the DEGs of fatty acid metabolism, 5 DEGs involved in phospholipid,  
326 cholesterol and triacylglycerol metabolism were found between domesticated and wild salmon  
327 (Figure 5 C). This included the *apoal-b* gene involved in lipoprotein synthesis and lipid  
328 transport, which was strongly higher expressed in domesticated salmon than wild, regardless  
329 of dietary treatment (Log2 FC > 3 &  $q < 0.001$ , see Figure 5 C and Supplementary Table 5). A  
330 key gene involved in synthesis of bile acid (*cyp7a1-a*), which is responsible for removal of  
331 cholesterol in liver, was higher expressed in domesticated salmon when given PL diet. Gene  
332 *ptdss2* involved in synthesis of phosphatidylserine, which is a major phospholipid in salmon,  
333 was higher expressed in domesticated salmon than wild fed VO diet (Log2 FC = 1.9,  $q =$   
334 0.0008), though similar trend was also found when the fish was given FO (Log2 FC = 1,  $q =$   
335 0.09) or PL diet (Log2 FC = 0.9,  $q = 0.2$ ). The expression of *hsl* gene involved in hydrolysing  
336 triacylglycerol (stored fat) to diacylglycerol, and diacylglycerol to monoacylglycerol was  
337 generally higher expressed in domesticated salmon than wild. On the other hand, the

338 expression of *mgll* involved in hydrolysing monoacylglycerol into free fatty acids was lower  
339 expressed in domesticated salmon. (Figure 5 C). In conclusion, the direct comparison of the  
340 transcriptomes of domesticated and wild salmon suggests that domestic salmon have boosted  
341 expression of genes involved in many aspects of lipid metabolism such as transport,  
342 endogenous synthesis and conversion of lipids and fatty acids in both gut and liver  
343 (Supplementary table 5).

344

345 To further investigate differences in the plasticity of fatty acid metabolism between  
346 domesticated and wild salmon, we analysed differences in putative compensatory shifts in gene  
347 regulation under diets with low (VO) vs high (FO) levels of LC-PUFA for wild and  
348 domesticated salmon separately. These analyses identified 38 DEGs in domesticated and 2  
349 DEGs in wild salmon (Supplementary Table 5). However, only DEGs in domestic salmon (9  
350 genes) were linked to lipid metabolism, specifically involved in fatty acyl-CoA synthesis (2  
351 genes), LC-PUFA synthesis (2 genes), lipogenesis (2 genes), and transcriptional regulation of  
352 lipid metabolism (2 genes) (Table 2).

353

354 3.5 Comparison of fatty acid composition between domesticated and wild salmon

355

356 To assess the differences between fish at the metabolite levels, we also measured fatty acid  
357 content in liver and pyloric caeca of wild and domesticated salmon at day 94 (Supplementary

358 Table 6). The results showed that variation in fatty acids composition was generally more  
359 driven by diet than strain. About 85% of the fatty acid content in liver and pyloric caeca differed  
360 between diets, but only 32% of the fatty acids differed in levels between wild and domesticated  
361 salmon ( $p < 0.05$ , Supplementary Table 6). Both wild and domesticated salmon given the VO  
362 diet showed higher levels of 18:3n-3 and 18:2n-6 contents in both liver and pyloric caeca but  
363 lower contents of the longer chain fatty acids (ARA, EPA & DHA) compared to both FO and  
364 PL diets (Figure 6). This pattern was consistent for all three lipid classes analysed (PtdCho,  
365 PtdEtn, and TAG). Although the differences in fatty acids content were generally small  
366 between wild and domesticated salmon fed the same diet, wild fish contained higher content of  
367 18:2n6 (9.1% in wild *versus* 7.3% in domesticated fish,  $p = 0.06$ ) and 18:3n3 (2.3% *versus*  
368 1.5%,  $p = 0.006$ ) in PtdEtn of liver when fed VO diet. Wild salmon also had higher content of  
369 18:3n3 (2.1% *versus* 1.8%,  $p = 0.04$ ) in PtdCho of liver when fed VO diet. On the other hand,  
370 wild salmon had significantly lower content of ARA in both PtdCho (1.6 % *versus* 2.1%,  $p =$   
371 0.02) and PtdEtn (3.1% *versus* 4.3%,  $p = 0.02$ ) of liver than wild fish when fed VO diet. No  
372 significant differences in DHA and EPA contents were found between domesticated and wild  
373 salmon fed the same diets.

374

#### 375 **4 Discussion**

376

377 The present study aimed to improve our understanding of the differences in metabolism of  
378 domesticated and wild salmon, with an emphasis on lipid metabolism. We approached this  
379 question using comparative analyses of growth, liver and gut transcriptomes, and lipid  
380 composition between domesticated and non-domesticated wild salmon given diets with three  
381 different lipid composition.

382

#### 383 4.1 The domestic metabolic syndrome and the link to the circadian clock pathway

384

385 As expected, domesticated salmon grew faster, both before and after start feeding, likely  
386 reflecting a higher basal metabolic rate (Bicskei, Bron, Glover, & Taggart, 2014) and higher  
387 feed intake and feed conversion efficiency (Thodesen et al., 1999) in domestic salmon. In line  
388 with this we found a clear difference in expression of genes involved in basal metabolism in  
389 liver between domesticated and wild salmon (Figure 3 A). In pyloric caeca, gene expression  
390 between wild and domesticated fish was associated with several signaling pathways and  
391 glycolipid synthesis (glycosphingolipids and glycopospholipid) which are main components  
392 of cell membranes. The promoters of these genes were enriched in TFBS motifs (ETV2,  
393 ATOH1, GR GATA-1) known to be involved in intestinal development and cell differentiation  
394 (Jedlicka & Gutierrez-Hartmann, 2008; Kanki et al., 2017; Lebenthal & Lebenthal, 1999)  
395 (Figure 3 B). One likely explanation for these transcriptomic differences in gut tissue is the

396 difference in growth rates and/or feed intake between domestic and wild fish domesticated  
397 (Thodesen et al., 1999).

398

399 The enrichment of CLOCK and BHLHB2 motifs in promoters of DEGs (Figure 3) suggests a  
400 link between the circadian clock pathway and gene expression differences observed between  
401 wild and domesticated salmon (Dunlap, 1999). This finding is interesting as many studies on  
402 mammals suggest a functional link between the circadian clock and regulation of feed intake,  
403 metabolic rates, and glucose and lipid metabolism (Paschos, 2015; Rudic et al., 2004). The top  
404 regulators of circadian oscillations are thought to be CLOCK and BMAL1 transcription factors  
405 which form a heterodimer and activate expression of downstream target (Lowrey & Takahashi,  
406 2000). CLOCK/BMAL are involved in regulating (directly or indirectly) a multitude of  
407 downstream processes, including genes of metabolism as well as genes that maintain the  
408 circadian oscillation of CLOCK/BMAL through negative feedback loops (Lowrey &  
409 Takahashi, 2000; Preitner et al., 2002; Takahashi, 2015). Our study does unfortunately not  
410 include samples that can shed light on differences between wild and domestic salmon circadian  
411 oscillations. However, we find that domesticated salmon generally has lower expression of  
412 genes encoding negative regulators of the CLOCK/BMAL (Figure 3 C) (Lowrey & Takahashi,  
413 2000; Preitner et al., 2002; Takahashi, 2015). In this context it is also interesting to note that the  
414 PPAR-RXR heterodimer, a major regulator of glucose (Jones et al., 2005) and lipid (Kliwer et  
415 al., 1997) homeostasis, is known to be under circadian rhythmicity in salmon (Betancor et al.,

416 2014). The *pparg* gene is consistently higher expressed in domesticated compared to wild  
417 salmon (Figure 5) and both PPAR and RXR are predicted to be enriched in promoters of genes  
418 differentially expressed in wild and domestic salmon (Figure 3 B). This result is in agreement  
419 with the tendency of higher clock gene expression in domesticated fish. It is important to note  
420 that all samples used for the gene expression were sampled between morning and noon within a  
421 2h time period. Moreover, fish were raised under constant light and continuous feeding which  
422 is known to abolish daily rhythmicity for both *nr1dl* (Betancor et al., 2014) and *cry-2* (Huang,  
423 Ruoff, & Fjellidal, 2010). We are thus confident that sampling bias related to daily rhythms  
424 has not impacted our results.

425

426 In conclusion, we speculate that the ‘domestic metabolic syndrome’ in salmon, characterized by  
427 increased basal metabolism and high growth (Bicskei et al., 2014; Tymchuk, Sakhrani, &  
428 Devlin, 2009), is partially caused by novel regulation or function of the circadian clock  
429 pathway. An interesting hypothesis is that strong selection on ‘fast growers’ during salmon  
430 domestication have selected for salmon genotypes that have impacted the circadian clock  
431 regulation and thereby induced changes in appetite and metabolism.

432

433 4.2 Differences in regulation of lipid metabolism between domesticated and wild salmon

434

435 In the present study we fed the fish three diets with different fatty acid composition to explore  
436 the idea that domestication has changed regulation of lipid metabolism in salmon. We have  
437 demonstrated that growth of domesticated salmon was virtually unaffected (Figure 1) by dietary  
438 fatty acid composition in the diet, while wild salmon was. This suggest that domesticated  
439 salmon have more effective lipid absorption, lipid transport, and better ability to conduct  
440 endogenous conversion and synthesis of lipids to compensate for dietary shortage of essential  
441 fatty acids. In line with this idea, our study found that *apoal\_2* gene was strikingly higher  
442 expressed in liver in domesticated compared to wild salmon, regardless of dietary lipid  
443 composition (Figure 5). Although the existence of lipoproteins and their apolipoprotein  
444 composition is not well described in fish, it is suggested that they should be similar to mammals  
445 (Jin et al., 2018). The higher expression levels of *apoal\_2* transcripts could therefore be one  
446 factor that contributes to fast growth of domesticated salmon, as this gene is key to the  
447 lipoprotein assembly and thereby transport of lipids between liver and other tissues such as  
448 muscle and adipose tissue (Xu et al., 2013). We also observed higher expression of hormone  
449 sensitive lipase gene (*hsl*) in liver of domesticated salmon than in wild. This suggests that  
450 domesticated salmon has higher ability of hydrolysing triacylglycerol, diacylglycerol and  
451 cholesterol ester into monoacylglycerol and free fatty acids (Kraemer & Shen, 2002; Quiroga &  
452 Lehner, 2012). The hydrolysed monoacylglycerol and fatty acids were more likely to be used in  
453 re-synthesis of lipids rather than further degraded to produce energy, because key genes  
454 involved in fatty acid degradation, the *mgll* gene involved in hydrolysing monoacylglycerol and

455 *cpt* genes involved in transporting fatty acids into the mitochondria for  $\beta$ -oxidation, were lower  
456 expressed in domesticated salmon than wild.

457 Wild fish fed the PL diet had the fastest growth rate, which supports previous findings that  
458 dietary inclusion of PL provides juvenile salmon better growth and development (Poston, 1990;  
459 Taylor et al., 2015). This is likely a consequence of PL promoting the absorption and transport  
460 of dietary lipid especially LC-PUFA (Carmona-Antonanzas, Taylor, Martinez-Rubio, &  
461 Tocher, 2015; Rolf Erik Olsen, Tore Dragnes, Myklebust, & Ringø, 2003; Y. Olsen et al.,  
462 2014a; D. R. Tocher, E. Å. Bendiksen, P. J. Campbell, & J. G. Bell, 2008). Young salmon have  
463 low capacity of *de-novo* synthesis of PL and may therefore struggle to maintain sufficient lipid  
464 levels for high growth (Carmona-Antonanzas et al., 2015; Jin et al., 2018; Rolf Erik Olsen et al.,  
465 2003; Y. Olsen et al., 2014b; D. R. Tocher, E. A. Bendiksen, P. J. Campbell, & J. G. Bell,  
466 2008). In the present study, we identified higher expression of 2 phosphate cytidyltransferase  
467 genes (*pcyt2c-a* and *pcyt2c-b*) in pyloric caeca of domesticated than wild salmon only when fish  
468 was given FO or VO diets, while no difference of gene expression was found when the fish was  
469 fed the PL diet. This suggests that domesticated salmon can increase the expression of genes  
470 involved in PL biosynthesis to compensate for the dietary shortage of PL, while such ability is  
471 limited in wild salmon at the same age. The expression of phosphatidylserine synthase gene  
472 (*ptdss2*) was generally higher expressed in both pyloric caeca and liver of domesticated salmon  
473 regardless of dietary treatment. The reason for the higher requirements of phosphatidylserine in  
474 domesticated salmon is not clear. One of the reasons could be that phosphatidylserine is a



475 constituent of the cell membrane, which is required when there is a potential higher level of cell  
476 proliferation in domesticated salmon.

477

478 Domesticated salmon are more adapted to the VO diet compared to wild strains. This was  
479 clearly revealed in the growth data where dietary VO significantly affected growth and final  
480 weight of wild salmon, but had no effect on the growth of domesticated salmon. It is generally  
481 assumed that a VO enriched diet can induce the expression of LC-PUFA synthesis genes in  
482 salmon (Stubhaug et al., 2005; Zheng et al., 2004). However, the key genes in the LC-PUFA  
483 synthesis pathway, *fads2d5* and *fads2d6a* were up-regulated only in domesticated salmon when  
484 fed the VO diet. This suggests that domesticated salmon is able to modify its fatty acid  
485 metabolism to compensate for the shortage of essential LC-PUFA in the diet, while such ability  
486 is very low in wild salmon. Although previous generations of domesticated salmon were fed  
487 VO diet only after transition to seawater, we still observed shifted expression of lipid  
488 metabolism domesticated but not wild salmon at freshwater stage. This suggests that the  
489 adaption to VO diet in domesticated salmon is independent of life stages. The present study  
490 showed higher contents of DHA, ARA and EPA and lower contents of 18:3n3 and 18:2n6 in  
491 phospholipid of liver in domesticated salmon than wild only when they were given VO diet.  
492 This was most likely an effect of higher LC-PUFA synthesis ability in domesticated salmon.  
493 Sterol regulatory binding protein 1 (SREBP1) is believed to be the key regulator of fatty acid  
494 metabolism and their expression is influenced by LC-PUFA level in the cell (Datsomor et al.,

495 2019). We observed an up-regulation of the *srebpld* gene in domesticated salmon, but not in  
496 wild fish when fed VO diet. Acyl-CoA synthase (*acsbg2b-b*) genes were also up-regulated,  
497 which was believed to be targeted by SREBP1 transcription factor (Datsomor et al., 2019).

498

499 In conclusion, the present study has provided a broad overview on transcriptomic and fatty  
500 acids differences in wild and domesticated salmon fed either FO, VO or PL enriched diets  
501 during early stages of development. The higher growth and development of domesticated  
502 salmon was in agreement with a combination of various genetic advantages including better  
503 uptake, transport and endogenesis of lipids. This was associated with altered circadian clock  
504 regulation between domesticated and wild salmon, which could possibly explain the changes in  
505 appetite and metabolism. Moreover, domesticated salmon had higher plasticity on gene  
506 expression when fed a VO diet with less essential LC-PUFA, while this ability is very low in  
507 wild salmon as the growth of fish significantly dropped for the VO diet. However, further  
508 experiment on circadian oscillations is required to support the differential expression of  
509 circadian genes found in present study. Other layers of genetic and biochemical information are  
510 also needed to get an in-depth and complete understanding of divergence of salmon after  
511 domestication. We suggest that future studies should focus on comparing metabolites, lipidome  
512 and proteome between domesticated and wild salmon.

513

514 **Acknowledgements**

515

516 The design and running of the experiment was supported by non-specific grants from  
517 Department of Biology, Norwegian University of Science and Technology (NTNU). The  
518 domesticated salmon eggs were kindly provided by AquaGen AS with assistance from Dr.  
519 Maren Mommens. The RNA-Seq and data analysis were financed by the Research Council of  
520 Norway (GenoSysFat, grant number 244164) and (DigiSal, grant number 248792). The  
521 sequencing service was provided by the Norwegian Sequencing Centre, a national technology  
522 platform hosted by the University of Oslo. The herring roe used in PL diet was kindly provided  
523 by Erik Løvaas from Marine BioExploitation AS. We also would like to thank Jostein Ervik for  
524 rearing the fish and Eleni Nikouli for the help on sampling. Thank you Torfinn Sparstad, Signe  
525 Dille Løvmo, Hanne Hellerud Hansen and Centre for Integrative Genetics (CIGENE) for  
526 RNA-Seq sample preparation. Thank you Dr. Gareth Gillard for pre-processing the RNAseq  
527 data, mapping reads to salmon genome and acquire count reads. We also thank the China  
528 Scholarship Council for providing financial support to Yang Jin for his PhD study.

529

## 530 **References**

531

- 532 Betancor, M. B., McStay, E., Minghetti, M., Migaud, H., Tocher, D. R., & Davie, A. (2014).  
533 Daily rhythms in expression of genes of hepatic lipid metabolism in Atlantic salmon  
534 (*Salmo salar* L.). *PLoS ONE*, 9(9), e106739.
- 535 Bicskei, B., Bron, J. E., Glover, K. A., & Taggart, J. B. (2014). A comparison of gene  
536 transcription profiles of domesticated and wild Atlantic salmon (*Salmo salar* L.) at  
537 early life stages, reared under controlled conditions. *BMC Genomics*, 15(1), 884.  
538 doi:10.1186/1471-2164-15-884

- 539 Cahu, C. L., Gisbert, E., Villeneuve, L. A. N., Morais, S., Hamza, N., Wold, P. A., & Infante, J.  
540 L. Z. (2009). Influence of dietary phospholipids on early ontogenesis of fish.  
541 *Aquaculture Research*, 40(9), 989-999. doi:10.1111/j.1365-2109.2009.02190.x
- 542 Carmona-Antonanzas, G., Taylor, J. F., Martinez-Rubio, L., & Tocher, D. R. (2015).  
543 Molecular mechanism of dietary phospholipid requirement of Atlantic salmon, *Salmo*  
544 *salar*, fry. *Biochim Biophys Acta*, 1851(11), 1428-1441.  
545 doi:10.1016/j.bbaliip.2015.08.006
- 546 Chen, Y., McCarthy, D., Robinson, M., & Smyth, G. K. (2014). edgeR: differential expression  
547 analysis of digital gene expression data User's Guide. In: UsersGuide.
- 548 Christie, W. W. (1973). *Lipid analysis* (Vol. 87): Pergamon press Oxford.
- 549 Datsomor, A. K., Zic, N., Li, K., Olsen, R. E., Jin, Y., Vik, J. O., . . . Winge, P. (2019).  
550 CRISPR/Cas9-mediated ablation of *elovl2* in Atlantic salmon (*Salmo salar* L.) inhibits  
551 elongation of polyunsaturated fatty acids and induces *Srebp-1* and target genes.  
552 *Scientific Reports*, 9(1), 7533. doi:10.1038/s41598-019-43862-8
- 553 Dunlap, J. C. (1999). Molecular bases for circadian clocks. *Cell*, 96(2), 271-290.  
554 doi:10.1016/s0092-8674(00)80566-8
- 555 Fleming, I. A., & Einum, S. (1997). Experimental tests of genetic divergence of farmed from  
556 wild Atlantic salmon due to domestication. *ICES Journal of Marine Science*, 54(6),  
557 1051-1063. doi:10.1016/s1054-3139(97)80009-4
- 558 Folch, J., Lees, M., & Stanley, G. H. S. (1957). A simple method for the isolation and  
559 purification of total lipides from animal tissues. *Journal of Biological Chemistry*,  
560 226(1), 497-509.
- 561 Gillard, G., Harvey, T. N., Gjuvslund, A., Jin, Y., Thomassen, M., Lien, S., . . . Sandve, S. R.  
562 (2018). Life-stage associated remodeling of lipid metabolism regulation in Atlantic  
563 salmon. *Molecular Ecology*. doi:10.1111/mec.14533
- 564 Gjedrem, T., Gjøen, H. M., & Gjerde, B. (1991). Genetic origin of Norwegian farmed Atlantic  
565 salmon. *Aquaculture*, 98(1), 41-50. doi:[https://doi.org/10.1016/0044-8486\(91\)90369-I](https://doi.org/10.1016/0044-8486(91)90369-I)
- 566 Heath, D. D., Heath, J. W., Bryden, C. A., Johnson, R. M., & Fox, C. W. (2003). Rapid  
567 Evolution of Egg Size in Captive Salmon. *Science*, 299(5613), 1738-1740.  
568 doi:10.1126/science.1079707
- 569 Huang, T.-s., Ruoff, P., & Fjellidal, P. G. (2010). Effect of continuous light on daily levels of  
570 plasma melatonin and cortisol and expression of clock genes in pineal gland, brain,  
571 and liver in Atlantic salmon postsmolts. *Chronobiology International*, 27(9-10),  
572 1715-1734.
- 573 Izquierdo, M. S. (1996). Essential fatty acid requirements of cultured marine fish larvae.  
574 *Aquaculture Nutrition*, 2(4), 183-191. doi:10.1111/j.1365-2095.1996.tb00058.x
- 575 Jedlicka, P., & Gutierrez-Hartmann, A. (2008). Ets transcription factors in intestinal  
576 morphogenesis, homeostasis and disease. *Histology and Histopathology*, 23(11),  
577 1417-1424. doi:10.14670/HH-23.1417
- 578 Jin, Y., Olsen, R. E., Østensen, M.-A., Gillard, G. B., Korsvoll, S. A., Santi, N., . . . Olsen, Y.  
579 (2018). Transcriptional development of phospholipid and lipoprotein metabolism in

- 580 different intestinal regions of Atlantic salmon (*Salmo salar*) fry. *Bmc Genomics*, 19(1),  
581 253. doi:10.1186/s12864-018-4651-8
- 582 Jones, J. R., Barrick, C., Kim, K.-A., Lindner, J., Blondeau, B., Fujimoto, Y., . . . Magnuson,  
583 M. A. (2005). Deletion of PPAR $\gamma$  in adipose tissues of mice protects against  
584 high fat diet-induced obesity and insulin resistance. *Proceedings of the National*  
585 *Academy of Sciences of the United States of America*, 102(17), 6207-6212.  
586 doi:10.1073/pnas.0306743102
- 587 Kanki, Y., Nakaki, R., Shimamura, T., Matsunaga, T., Yamamizu, K., Katayama, S., . . .  
588 Minami, T. (2017). Dynamically and epigenetically coordinated GATA/ETS/SOX  
589 transcription factor expression is indispensable for endothelial cell differentiation.  
590 *Nucleic Acids Research*, 45(8), 4344-4358. doi:10.1093/nar/gkx159
- 591 Kliewer, S. A., Sundseth, S. S., Jones, S. A., Brown, P. J., Wisely, G. B., Koble, C. S., . . .  
592 Lehmann, J. M. (1997). Fatty acids and eicosanoids regulate gene expression through  
593 direct interactions with peroxisome proliferator-activated receptors  $\alpha$  and  $\gamma$ .  
594 *Proceedings of the National Academy of Sciences*, 94(9), 4318-4323.  
595 doi:10.1073/pnas.94.9.4318
- 596 Kraemer, F. B., & Shen, W. J. (2002). Hormone-sensitive lipase: control of intracellular  
597 tri-(di-)acylglycerol and cholesteryl ester hydrolysis. *J Lipid Res*, 43(10), 1585-1594.
- 598 Lebenthal, A., & Lebenthal, E. (1999). The Ontogeny of the Small Intestinal Epithelium.  
599 *Journal of Parenteral and Enteral Nutrition*, 23(5S), S3-S6.  
600 doi:10.1177/014860719902300502
- 601 Li, K. S., & Olsen, R. E. (2017). Metabolism of sn-1(3)-Monoacylglycerol and  
602 sn-2-Monoacylglycerol in Caecal Enterocytes and Hepatocytes of Brown Trout  
603 (*Salmo trutta*). *Lipids*, 52(1), 61-71. doi:10.1007/s11745-016-4215-0
- 604 Lowrey, P. L., & Takahashi, J. S. (2000). GENETICS OF THE MAMMALIAN CIRCADIAN  
605 SYSTEM: Photic Entrainment, Circadian Pacemaker Mechanisms, and  
606 Posttranslational Regulation. *Annual Review of Genetics*, 34(1), 533-562.  
607 doi:10.1146/annurev.genet.34.1.533
- 608 Mulugeta, T. D., Nome, T., To, T.-H., Gundappa, M. K., Macqueen, D. J., Våge, D. I., . . .  
609 Hvidsten, T. R. (2019). SalMotifDB: a tool for analyzing putative transcription factor  
610 binding sites in salmonid genomes. *BMC Genomics*, 20(1), 694.  
611 doi:10.1186/s12864-019-6051-0
- 612 Olsen, R. E., & Henderson, R. J. (1989). The rapid analysis of neutral and polar marine lipids  
613 using double-development hptlc and scanning densitometry. *Journal of Experimental*  
614 *Marine Biology and Ecology*, 129(2), 189-197. doi:Doi  
615 10.1016/0022-0981(89)90056-7
- 616 Olsen, R. E., Tore Dragnes, B., Myklebust, R., & Ringø, E. (2003). Effect of soybean oil and  
617 soybean lecithin on intestinal lipid composition and lipid droplet accumulation of  
618 rainbow trout, *Oncorhynchus mykiss* Walbaum. *Fish Physiology and Biochemistry*,  
619 29(3), 181-192. doi:10.1023/B:FISH.0000045708.67760.43
- 620 Olsen, Y., Evjemo, J. O., Kjørsvik, E., Larssen, H., Li, K., Overrein, I., & Rainuzzo, J.

- 621 (2014a). DHA content in dietary phospholipids affects DHA content in phospholipids  
622 of cod larvae and larval performance. *Aquaculture*, 428-429, 203-214.  
623 doi:<https://doi.org/10.1016/j.aquaculture.2014.03.002>
- 624 Olsen, Y., Evjemo, J. O., Kjørsvik, E., Larssen, H., Li, K., Overrein, I., & Rainuzzo, J.  
625 (2014b). DHA content in dietary phospholipids affects DHA content in phospholipids  
626 of cod larvae and larval performance. *Aquaculture*, 428-429(0), 203-214.  
627 doi:<http://dx.doi.org/10.1016/j.aquaculture.2014.03.002>
- 628 Paschos, G. K. (2015). Circadian clocks, feeding time, and metabolic homeostasis. *Frontiers*  
629 *in Pharmacology*, 6(112). doi:10.3389/fphar.2015.00112
- 630 Poston, H. A. (1990). Effect Of Body Size on Growth, Survival, And Chemical-Composition  
631 Of Atlantic Salmon Fed Soy Lecithin And Choline. *Progressive Fish-Culturist*, 52(4),  
632 226-230. doi:Doi 10.1577/1548-8640(1990)052<0226:Eobsog>2.3.Co;2
- 633 Preitner, N., Damiola, F., Luis Lopez, M., Zakany, J., Duboule, D., Albrecht, U., & Schibler,  
634 U. (2002). The Orphan Nuclear Receptor REV-ERB $\beta$ ; Controls Circadian  
635 Transcription within the Positive Limb of the Mammalian Circadian Oscillator. *Cell*,  
636 110(2), 251-260. doi:10.1016/S0092-8674(02)00825-5
- 637 Quiroga, A. D., & Lehner, R. (2012). Liver triacylglycerol lipases. *Biochimica et Biophysica*  
638 *Acta (BBA) - Molecular and Cell Biology of Lipids*, 1821(5), 762-769.  
639 doi:<https://doi.org/10.1016/j.bbalip.2011.09.007>
- 640 Roberge, C., Einum, S., Guderley, H., & Bernatchez, L. (2006). Rapid parallel evolutionary  
641 changes of gene transcription profiles in farmed Atlantic salmon. *Molecular Ecology*,  
642 15(1), 9-20. doi:doi:10.1111/j.1365-294X.2005.02807.x
- 643 Roberge, C., Normandeau, E., Einum, S., Guderley, H., & Bernatchez, L. (2008). Genetic  
644 consequences of interbreeding between farmed and wild Atlantic salmon: insights  
645 from the transcriptome. *Mol Ecol*, 17(1), 314-324.  
646 doi:10.1111/j.1365-294X.2007.03438.x
- 647 Robinson, M. D., McCarthy, D. J., & Smyth, G. K. (2010). edgeR: a Bioconductor package  
648 for differential expression analysis of digital gene expression data. *Bioinformatics*,  
649 26(1), 139-140. doi:10.1093/bioinformatics/btp616
- 650 Rudic, R. D., McNamara, P., Curtis, A.-M., Boston, R. C., Panda, S., Hogenesch, J. B., &  
651 FitzGerald, G. A. (2004). BMAL1 and CLOCK, two essential components of the  
652 circadian clock, are involved in glucose homeostasis. *PLoS Biology*, 2(11), e377.
- 653 Sargent, J. R., Tocher, D. R., & Bell, J. G. (2002). The lipids. *Fish nutrition*, 3, 181-257.
- 654 Shroyer, N. F., Helmrath, M. A., Wang, V. Y., Antalffy, B., Henning, S. J., & Zoghbi, H. Y.  
655 (2007). Intestine-specific ablation of mouse atonal homolog 1 (Math1) reveals a role  
656 in cellular homeostasis. *Gastroenterology*, 132(7), 2478-2488.  
657 doi:10.1053/j.gastro.2007.03.047
- 658 Stubhaug, I., Tocher, D. R., Bell, J. G., Dick, J. R., Torstensen, B. E. J. B. e. B. A.-M., &  
659 Lipids, C. B. o. (2005). Fatty acid metabolism in Atlantic salmon (*Salmo salar* L.)  
660 hepatocytes and influence of dietary vegetable oil. *1734(3)*, 277-288.
- 661 Takahashi, J. S. (2015). Molecular components of the circadian clock in mammals. *Diabetes*,

- 662 *Obesity and Metabolism*, 17 Suppl 1, 6-11. doi:10.1111/dom.12514
- 663 Taylor, J. F., Martinez-Rubio, L., del Pozo, J., Walton, J. M., Tinch, A. E., Migaud, H., &  
664 Tocher, D. R. (2015). Influence of dietary phospholipid on early development and  
665 performance of Atlantic salmon (*Salmo salar*). *Aquaculture*, 448, 262-272.  
666 doi:10.1016/j.aquaculture.2015.06.012
- 667 Team, R. C. (2013). R: A language and environment for statistical computing.
- 668 Thodesen, J., Grisdale-Helland, B., Helland, S. J., & Gjerde, B. (1999). Feed intake, growth  
669 and feed utilization of offspring from wild and selected Atlantic salmon (*Salmo salar*).  
670 *Aquaculture*, 180(3), 237-246. doi:[https://doi.org/10.1016/S0044-8486\(99\)00204-5](https://doi.org/10.1016/S0044-8486(99)00204-5)
- 671 Tocher, D. R., Bendiksen, E. A., Campbell, P. J., & Bell, J. G. (2008). The role of  
672 phospholipids in nutrition and metabolism of teleost fish. *Aquaculture*, 280(1-4),  
673 21-34. doi:DOI 10.1016/j.aquaculture.2008.04.034
- 674 Tocher, D. R., Bendiksen, E. Å., Campbell, P. J., & Bell, J. G. (2008). The role of  
675 phospholipids in nutrition and metabolism of teleost fish. *Aquaculture*, 280(1), 21-34.  
676 doi:<https://doi.org/10.1016/j.aquaculture.2008.04.034>
- 677 Tontonoz, P., Hu, E., & Spiegelman, B. M. (1994). Stimulation of adipogenesis in fibroblasts  
678 by PPAR $\gamma$ 2, a lipid-activated transcription factor. *Cell*, 79(7), 1147-1156.  
679 doi:[https://doi.org/10.1016/0092-8674\(94\)90006-X](https://doi.org/10.1016/0092-8674(94)90006-X)
- 680 Tymchuk, W., Sakhrani, D., & Devlin, R. (2009). Domestication causes large-scale effects on  
681 gene expression in rainbow trout: Analysis of muscle, liver and brain transcriptomes.  
682 *General and Comparative Endocrinology*, 164(2), 175-183.  
683 doi:<https://doi.org/10.1016/j.ygcen.2009.05.015>
- 684 Van Dyck, F., Braem, C. V., Chen, Z., Declercq, J., Deckers, R., Kim, B. M., . . . Shivdasani,  
685 R. A. (2007). Loss of the PlagL2 transcription factor affects lacteal uptake of  
686 chylomicrons. *Cell Metabolism*, 6(5), 406-413. doi:10.1016/j.cmet.2007.09.010
- 687 Xu, Q., Feng, C. Y., Hori, T. S., Plouffe, D. A., Buchanan, J. T., & Rise, M. L. (2013).  
688 Family-specific differences in growth rate and hepatic gene expression in juvenile  
689 triploid growth hormone (GH) transgenic Atlantic salmon (*Salmo salar*). *Comparative*  
690 *Biochemistry and Physiology Part D: Genomics and Proteomics*, 8(4), 317-333.
- 691 Ytrestøyl, T., Aas, T. S., & Åsgård, T. (2015). Utilisation of feed resources in production of  
692 Atlantic salmon (*Salmo salar*) in Norway. *Aquaculture*, 448, 365-374.  
693 doi:<https://doi.org/10.1016/j.aquaculture.2015.06.023>
- 694 Zheng, X., Tocher, D. R., Dickson, C. A., Bell, J. G., & Teale, A. J. J. A. (2004). Effects of  
695 diets containing vegetable oil on expression of genes involved in highly unsaturated  
696 fatty acid biosynthesis in liver of Atlantic salmon (*Salmo salar*). 236(1-4), 467-483.

697

## 698 **Data Accessibility Statement**

699

700 Raw sequences are publicly available on ArrayExpress under accession number  
701 E-MATB-8306.

702

703 **Author Contributions**

704

705 Yang Jin, Yngvar Olsen, Rolf Erik Olsen, Simen Rød Sandve and Olav Vadstein designed and  
706 performed the research. Yang Jin and Thomas Nelson Harvey performed the transcriptomic  
707 analysis. Yang Jin and Keshuai Li performed the lipid and fatty acid analysis. Jon Olav Vik and  
708 Simen Rød Sandve guided the transcriptomic analysis and revised the manuscript. Yngvar  
709 Olsen and Rolf Erik Olsen guided the lipid analysis and revised the manuscript. Mari-Ann  
710 Østensen and Nina Santi provided input on the experimental design, carried out the experiment  
711 and sampling and reviewed the manuscript. All authors participated in the revision of this paper  
712 by providing comments and editing.



Table 1 Percent of fatty acids in total fatty acids of three diets rich in fish oil (FO), vegetable and plant oil (VO), or vegetable and marine phospholipid oil (PL).

|         | FO      | VO      | PL      |
|---------|---------|---------|---------|
| 14:0    | 3.6±0.0 | 0.9±0.0 | 3.7±0.0 |
| 16:0    | 18±0.2  | 20±0.2  | 16±0.2  |
| 16:1n-7 | 4.3±0.0 | 0.8±0.0 | 3.1±0.0 |
| 18:0    | 4.4±0.1 | 3.7±0.1 | 3.5±0.5 |
| 18:1n-9 | 14±0.1  | 26±0.3  | 22±0.1  |
| 18:1n-7 | 2.5±0.0 | 7.1±0.2 | 3.2±0.0 |
| 18:2n-6 | 6.8±0.0 | 15±0.2  | 11±0.1  |
| 18:3n-3 | 1.2±0.0 | 11±0.2  | 3.1±0.0 |
| 20:1n-9 | 2.5±0.0 | 1.7±0.0 | 2.4±0.0 |
| 20:4n-6 | 1.3±0.0 | 0.3±0.0 | 0.7±0.0 |
| 20:5n-3 | 7.7±0.0 | 1.7±0.0 | 7.3±0.1 |
| 22:1n-9 | 2.2±0.0 | 1.2±0.0 | 1.8±0.0 |
| 22:6n-3 | 17±0.0  | 3.7±0.1 | 11±0.1  |

Data is shown in mean ± sd (n=2).

Table 2 Log2 fold change and adjusted  $p$  value ( $q$ ) of lipid gene expression in liver of domesticated/wild salmon feeding vegetable oil (VO) diet compared to fish oil (FO).

| genename         | Farm VOvsFO |       | Wild VOvsFO |      |
|------------------|-------------|-------|-------------|------|
|                  | logFC       | $q$   | logFC       | $q$  |
| <i>acsbg2b-b</i> | 1.7         | 0.01  | 1.0         | 0.64 |
| <i>acsl1a-a</i>  | 1.6         | 0.02  | 1.0         | 0.64 |
| <i>agpat3a-b</i> | 1.4         | 0.002 | 1.2         | 0.09 |
| <i>agpat3b-a</i> | 1.1         | 0.01  | 0.5         | 0.72 |
| <i>fabp7b</i>    | 6.0         | 0.001 | 4.2         | 0.13 |
| <i>fads2d6a</i>  | 1.3         | 0.008 | 0.8         | 0.54 |
| <i>fads2d5</i>   | 1.2         | 0.01  | 0.2         | 1.00 |
| <i>srebp1c</i>   | 1.4         | 0.03  | 0.9         | 0.62 |
| <i>srebp1d</i>   | 1.6         | 0.003 | 0.5         | 0.88 |

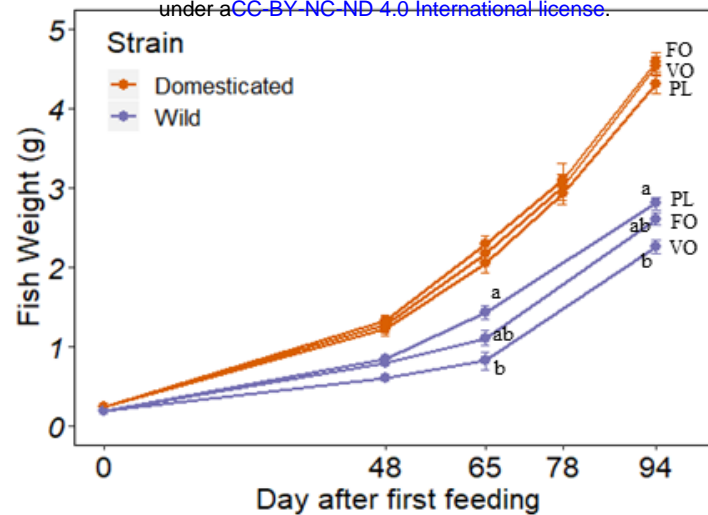

**Figure 1** Weight of domesticated and wild salmon fed diets high in fish oil (FO), vegetable oil (VO) or phospholipid oil (PL) during early stages of development. Data are means  $\pm$  SE ( $n > 100$  per group at day 93,  $n > 20$  at other days). Different letters indicate significant ( $p < 0.05$ ) different of fish weight between wild fish fed FO, VO and PL diet at day 65 and 94.

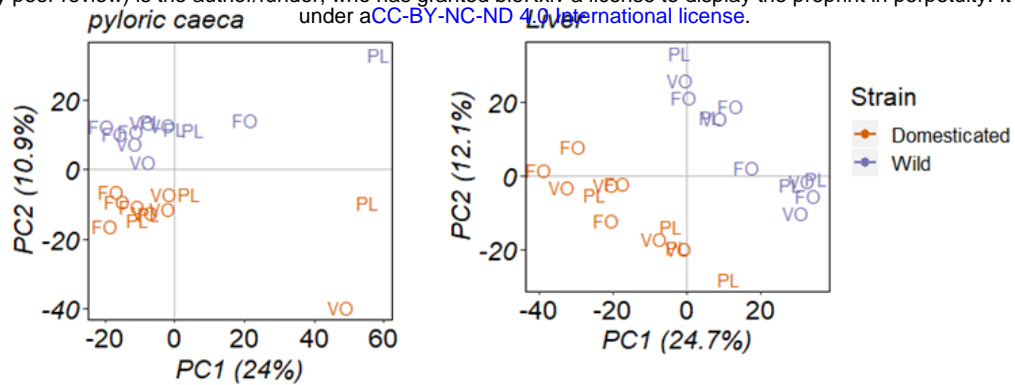

**Figure 2** Score plot of PCA on log<sub>2</sub> count per million (CPM) of the top 1000 most variant genes across all samples (4 replicates x 2 strains x 3 Diets). Two salmon strains (domesticated and wild) were fed either fish oil (FO), vegetable oil (VO) or phospholipid (PL) rich diets from initial feeding. Pyloric caeca and liver samples were taken after 94 days of feeding.

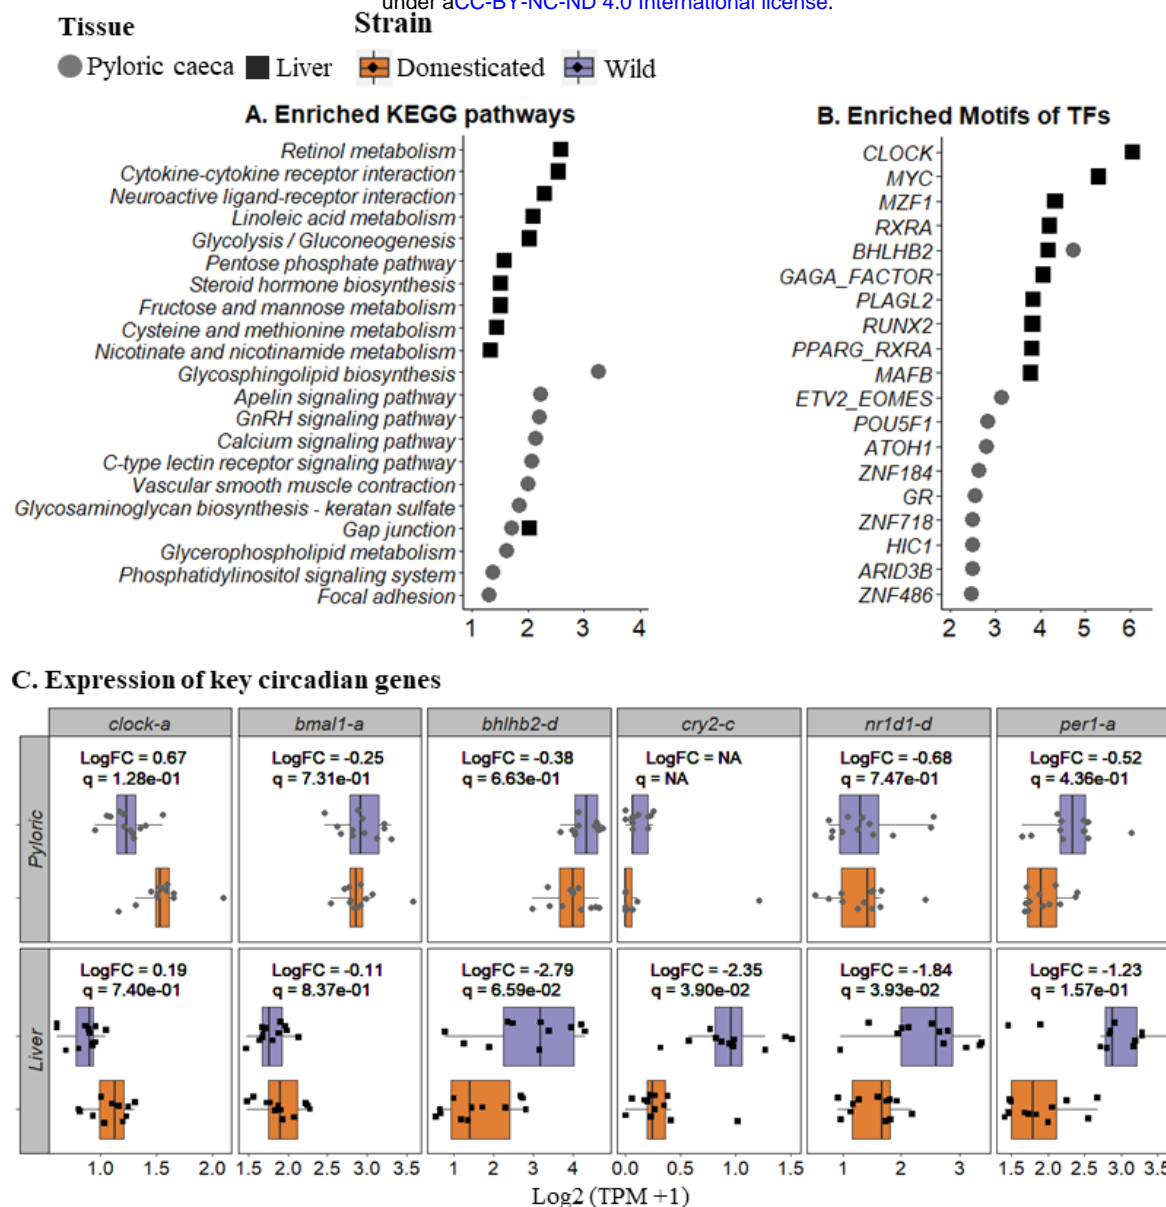

**Figure 3 Differential expressed genes (DEGs) between domesticated and wild salmon. A)** KEGG enrichment shows significant ( $p < 0.05$ ) enriched pathway, and proportion (%) of up/down regulated DEGs in each pathway. **B)** Motif enrichment analysis shows top 10 most significantly ( $p < 0.005$ ) enriched motifs of transcription factors in promoter regions (-1000bp to 200bp from TSS) of DEGs as compared to all expressed genes in pyloric caeca and liver. Hypergeometric test was applied on both KEGG and motif enrichment analyses, by comparing the number of DEGs to total genes annotated to each KEGG pathway or each motif. Motif enrichment analysis was done by using SalMotifDB (<https://salmobase.org/apps/SalMotifDB>). **C)** Expression of key circadian genes in pyloric caeca and liver of domesticated and wild salmon. Gene expression was shown in log<sub>2</sub> transcript per million plus one (TPM +1). No statistics was shown for *cry2-c* gene in pyloric caeca, since the gene expression is too low (CPM < 1) to be used for differential expression analysis.

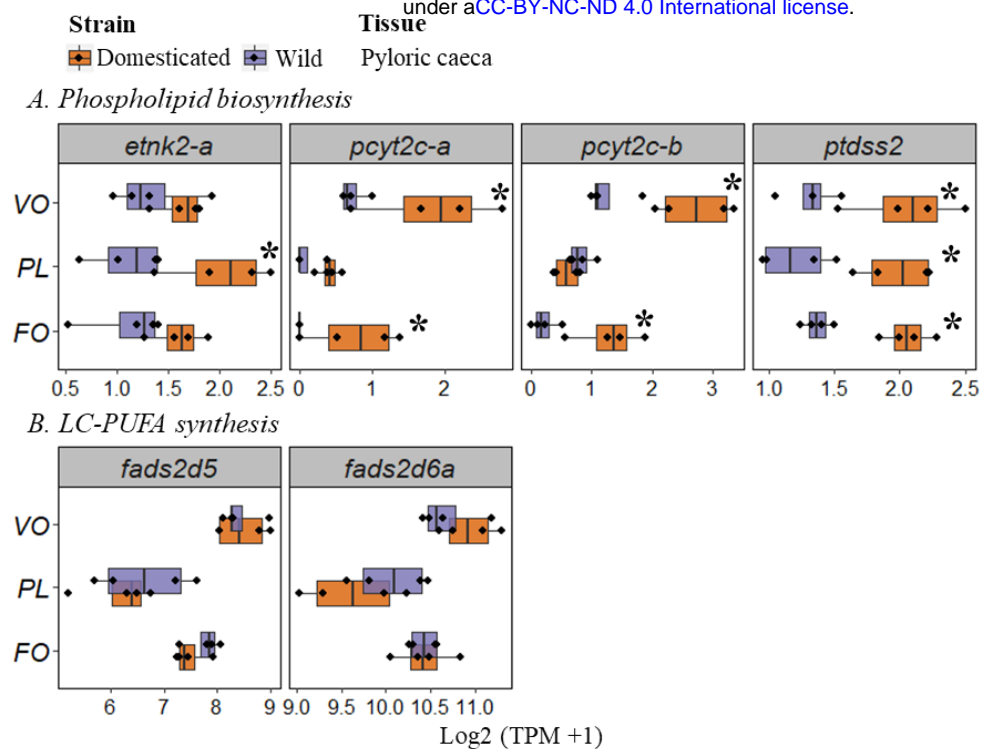

**Figure 4 Expression of 6 genes involved in lipid metabolism in pyloric caeca of wild and domesticated salmon at day 94 after feeding either fish oil (FO), vegetable oil (VO) or phospholipid (PL) diets.** Gene expression was shown as Log<sub>2</sub> transcript per million plus one (TPM + 1) which was normalized by library size and mRNA length. Asterisk indicates differential expressed genes (DEGs,  $q < 0.05$  &  $|\log_2FC| > 1$ ) between domesticated and wild salmon under each dietary treatment.

Domesticated Wild Liver

A. *Transcription factors*

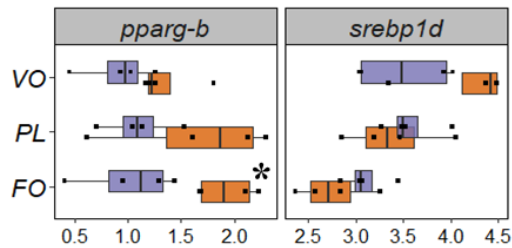

B. *Fatty acid metabolism*

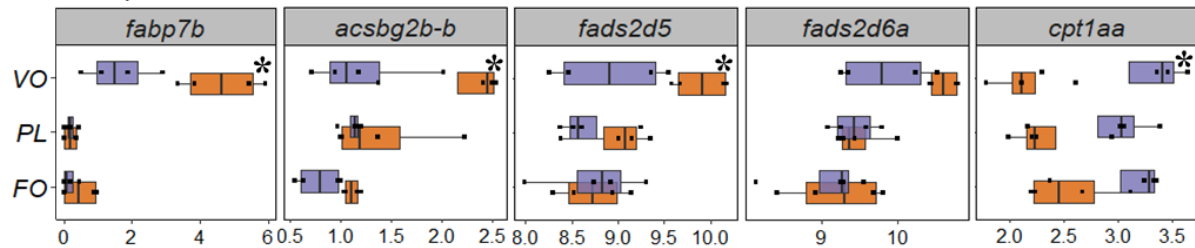

C. *Phospholipid, triacylglycerol and cholesterol metabolism*

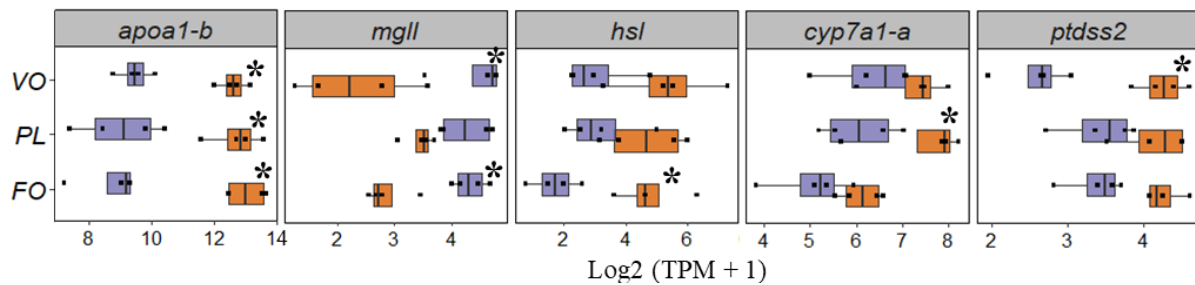

**Figure 5 Expression of 14 genes involved in lipid metabolism in liver of wild and domesticated salmon at day 94 after feeding either fish oil (FO), vegetable oil (VO) or phospholipid (PL) diets.** Gene expression was shown as Log<sub>2</sub> transcript per million plus one (TPM + 1) which was normalized by library size and mRNA length. Asterisk indicates significant ( $q < 0.05$  &  $|\text{Log}_2\text{FC}| > 1$ ) different of gene expression between domesticated and wild salmon under each dietary treatment separately.

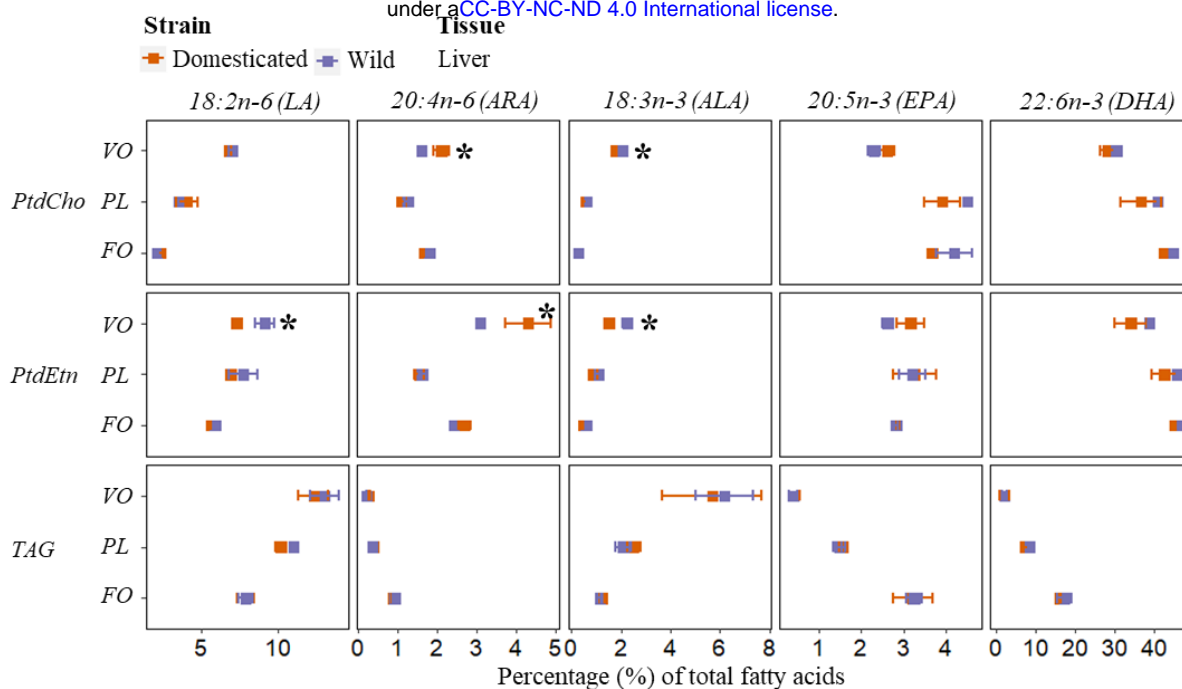

**Figure 6 Percentage of liver fatty acid composition in triacylglycerol (TAG), phosphatidylcholine (PtdCho) and phosphatidylethanolamine (PtdEtn) of wild and domesticated salmon fed either fish oil (FO), vegetable oil (VO) and phospholipid (PL) rich diets at day 94.** A two-way ANOVA was applied to test the fatty acid differences between fish strains and dietary treatment (strain\*diet) separately in each lipid class. Tukey's HSD post-hoc test was then applied to test the fatty acid difference between each group. Asterisk in the figure indicate significant ( $p < 0.05$ ) different of fatty acid between domesticated and wild salmon at certain day and dietary treatment. The composition of other fatty acids and their ANOVA test were shown in Supplementary 7.
